# Supplementary material for: Tumor Microenvironment Responsive CD8+ T Cells and Myeloid‐Derived Suppressor Cells to Trigger CD73 Inhibitor AB680‐Based Synergistic Therapy for Pancreatic Cancer
Source: PubMed Central journal article supplement (PMC10667825; doi:10.1002/advs.202302498), 2023-10-22
Supplement: ADVS-10-2302498-s001.pdf [file ADVS-10-2302498-s001.pdf]

## Supporting Information

for *Adv. Sci.*, DOI 10.1002/advs.202302498

Tumor Microenvironment Responsive CD8<sup>+</sup> T Cells and Myeloid-Derived Suppressor Cells to Trigger CD73 Inhibitor AB680-Based Synergistic Therapy for Pancreatic Cancer

*Qiangda Chen, Hanlin Yin, Junyi He, Yuqi Xie, Wenquan Wang, Huaxiang Xu, Lei Zhang, Chenye Shi, Jun Yu, Wenchuan Wu, Liang Liu\*, Ning Pu\* and Wenhui Lou\**

## Supporting Information

### **Tumor microenvironment responsive CD8<sup>+</sup> T cells and myeloid-derived suppressor cells to trigger CD73 inhibitor AB680-based synergistic therapy for pancreatic cancer**

*Qiangda Chen, Hanlin Yin, Junyi He, Yuqi Xie, Wenquan Wang, Huaxiang Xu, Lei Zhang, Chenye Shi, Jun Yu, Wenchuan Wu, Liang Liu<sup>\*</sup>, Ning Pu<sup>\*</sup>, Wenhui Lou<sup>\*</sup>*

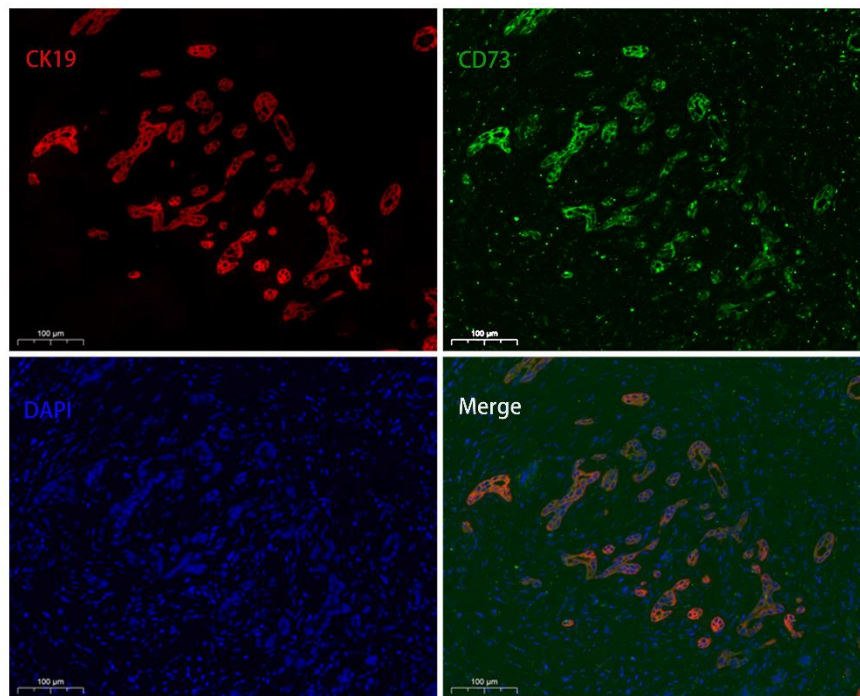

**Supplementary Figure 1.** Representative immunofluorescence staining of CD73 and CK19. CK19: red; CD73: green; DAPI: blue. Scale bar: 200μm.

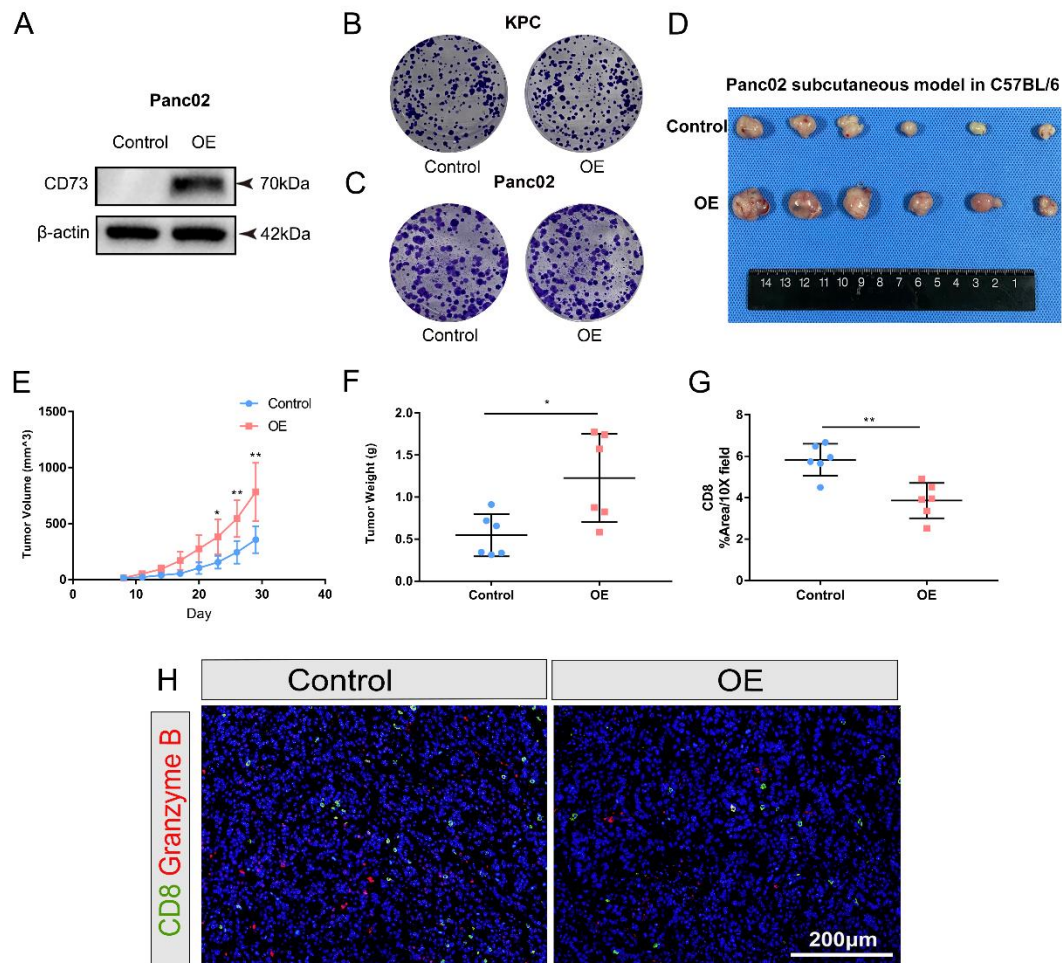

**Supplementary Figure 2.** Overexpression of CD73 in murine tumor cells promotes tumor growth of subcutaneous tumor-bearing mice. (A) Western blot analysis for CD73 in CD73 overexpressing (OE) and control Panc02 cells. (B-C) Clone formation assay for 2 weeks for cell proliferation after CD73 overexpression in KPC (B) and Panc02 (C) cells. (D-F) Image (D), volumes (E), and weights (F) of the CD73 OE vs Control Panc02 tumors (n=6 samples per group). \*p<0.05, \*\*p<0.01 in Student's t-test. Data presented as mean ± SD. (G) Quantification of immunohistochemistry result of CD8<sup>+</sup> T cells in the CD73 OE vs Control Panc02 tumors (n=6 samples per group). \*\*p<0.01 in Student's t-test. Data presented as mean ± SD. (H) Representative immunofluorescence staining of CD8 and Granzyme B. Granzyme B: red; CD8: green; DAPI: blue. Scale bar: 200μm.

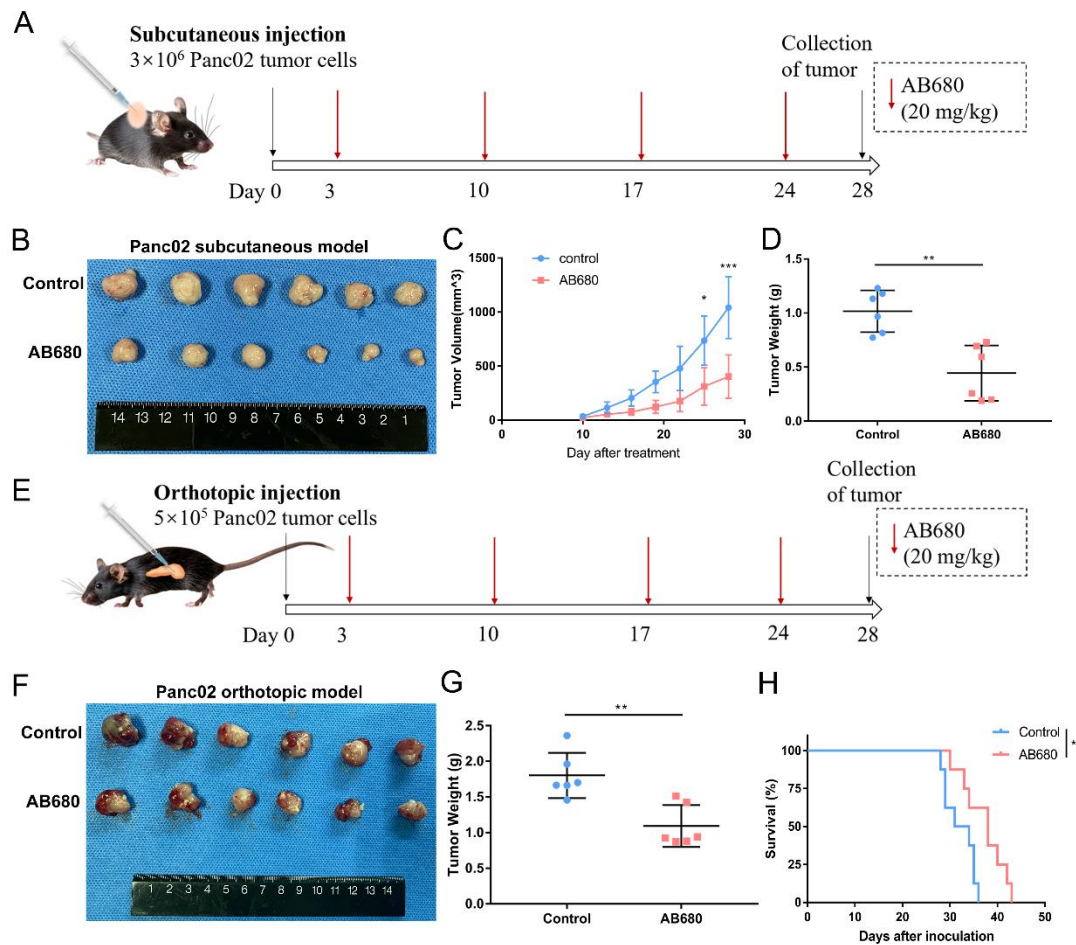

**Supplementary Figure 3.** AB680 reduces the tumor burden and prolongs survival in Panc02 subcutaneous and orthotopic models. (A) Schematic showing the schedule of CD73 inhibitor AB680 treatment in Panc02 subcutaneous model. (B-D) Image (D), volumes (E), and weights (F) of the AB680-treated vs Control Panc02 subcutaneous tumors (n=6 samples per group). \* $p < 0.05$ , \*\* $p < 0.01$  in Student's t-test. Data presented as mean  $\pm$  SD. (E) Schematic showing the schedule of AB680 treatment in Panc02 orthotopic model. (F-G) Image (F) and weights (G) of the AB680-treated vs Control Panc02 orthotopic tumors (n=6 samples per group). \*\* $p < 0.01$  in Student's t-test. Data presented as mean  $\pm$  SD. (H) Kaplan-Meier survival analysis of tumor-bearing mice untreated or treated with 20 mg/kg AB680 (n=8 samples per group). \* $p < 0.05$  in the log-rank test.

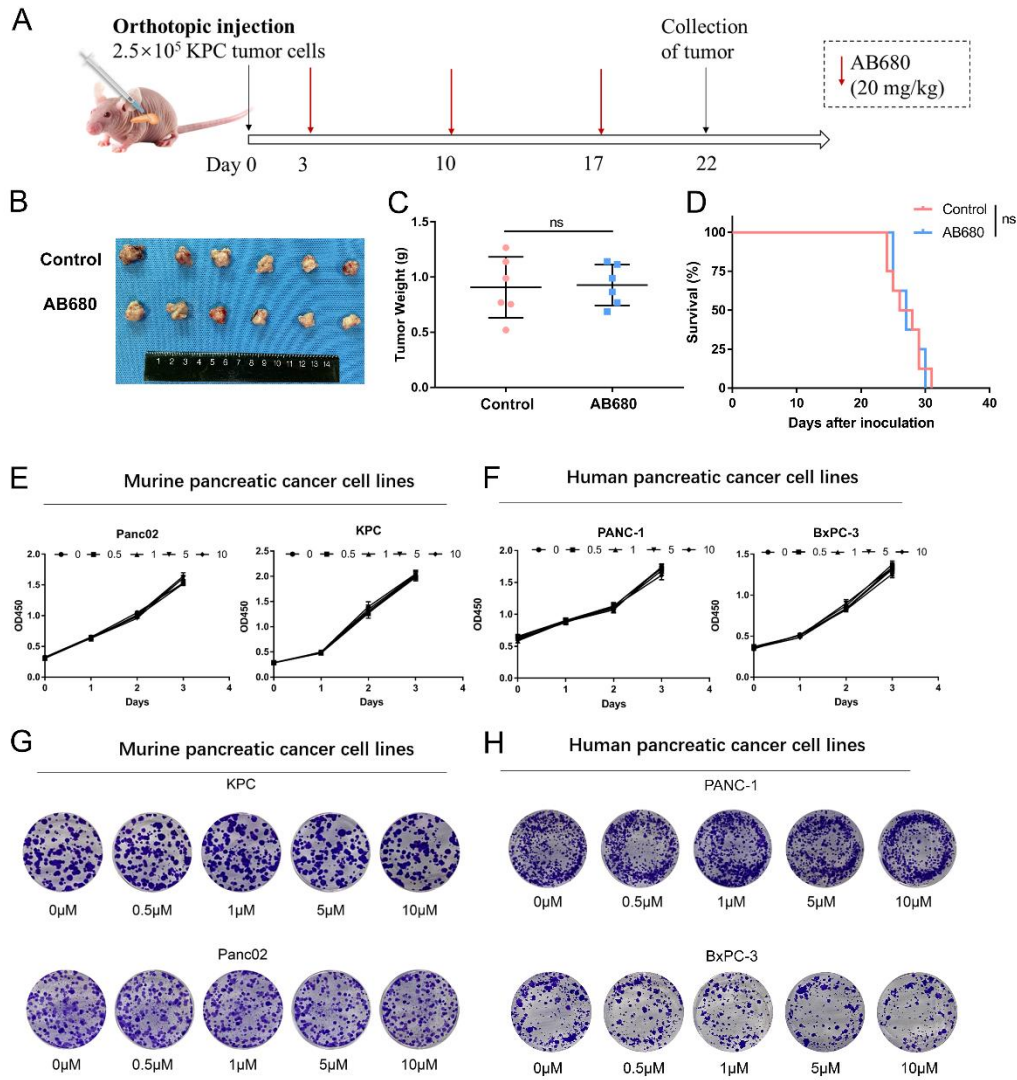

**Supplementary Figure 4.** AB680 has no anti-tumor effect in nude mice and *in vitro*. (A) Schematic showing the schedule of CD73 inhibitor AB680 treatment in KPC subcutaneous model of nude mice. (B-C) Image (B) and weights (C) of the AB680-treated vs Control KPC orthotopic tumors in nude mice (n=6 samples per group). Data presented as mean ± SD. ns = no significance in Student's t-test. (D) Kaplan-Meier survival analysis of tumor-bearing nude mice untreated or treated with 20 mg/kg AB680 (n=8 samples per group). ns, no significance in the log-rank test. (E-F) CCK-8 assay at 1, 2, and 3 days for cell proliferation after the indicated concentration of AB680 stimulation in murine (E) and human (F) pancreatic cancer cell lines. n=4 samples per group. (G-H) Clone formation assay at 1, 2, and 3 days for cell proliferation after the indicated concentration of AB680 stimulation in murine (G) and human (H) pancreatic cancer cell lines.

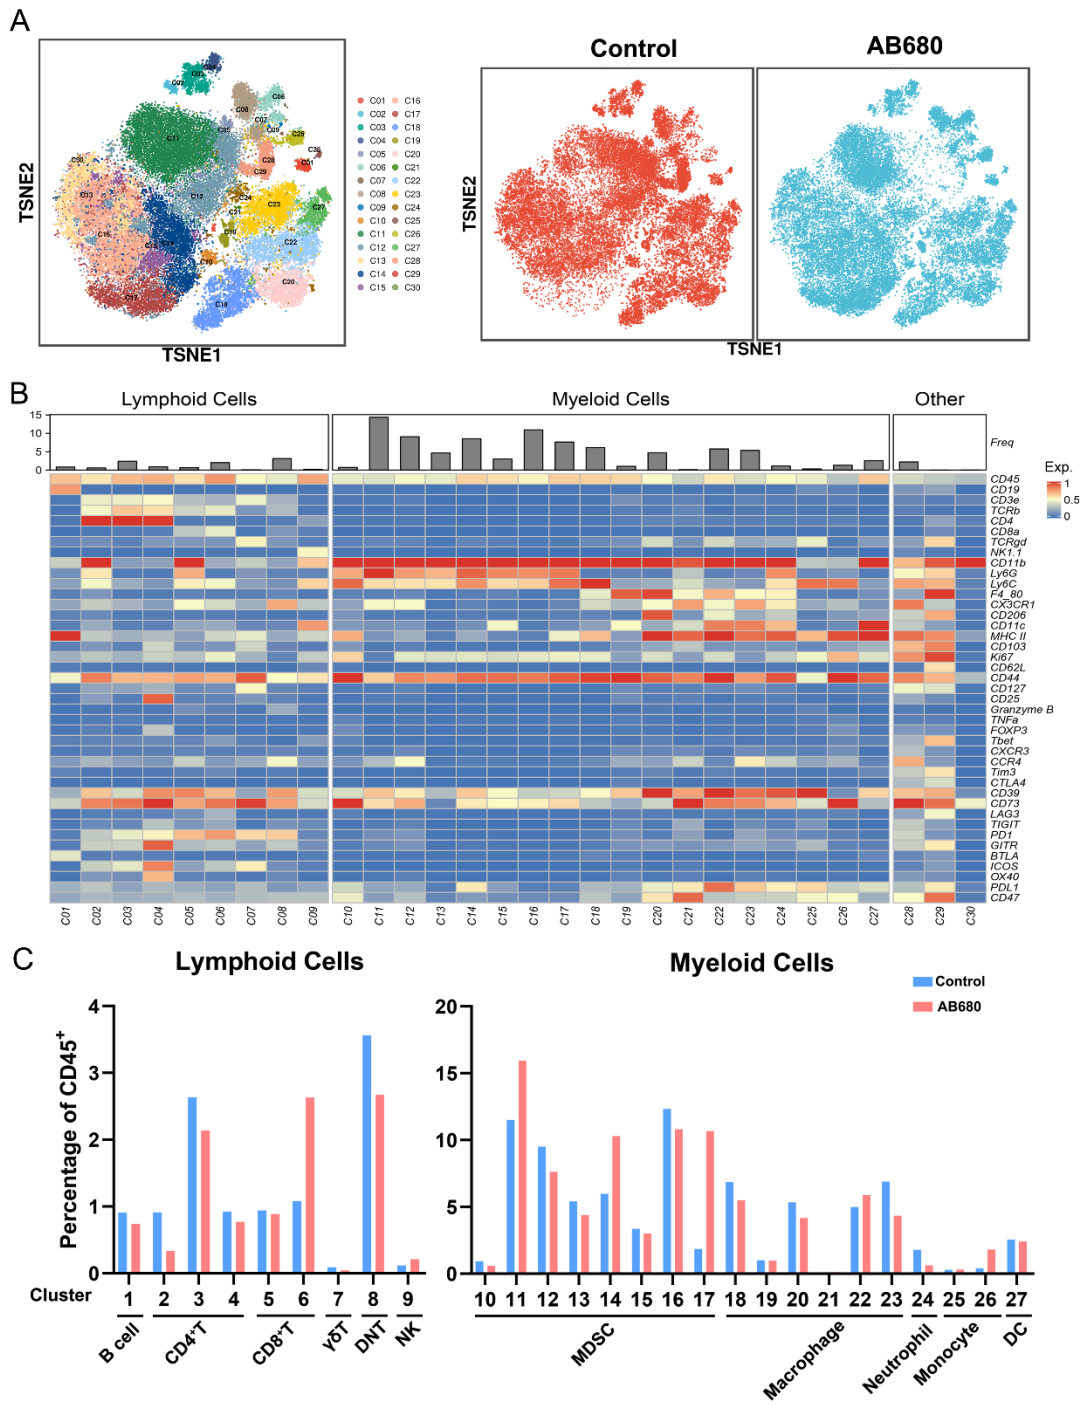

**Supplementary Figure 5.** AB680 alters the tumor microenvironment. (A) The t-distributed stochastic neighbor embedding (t-SNE) plot of CD45<sup>+</sup> tumor-infiltrating immune cells of the total six samples (left), control and AB680-treated samples (right). (B) Heatmap of 42 markers in each cell cluster. (C) The frequencies of each cell cluster among the CD45<sup>+</sup> cells in the two groups (n=3 samples per group).

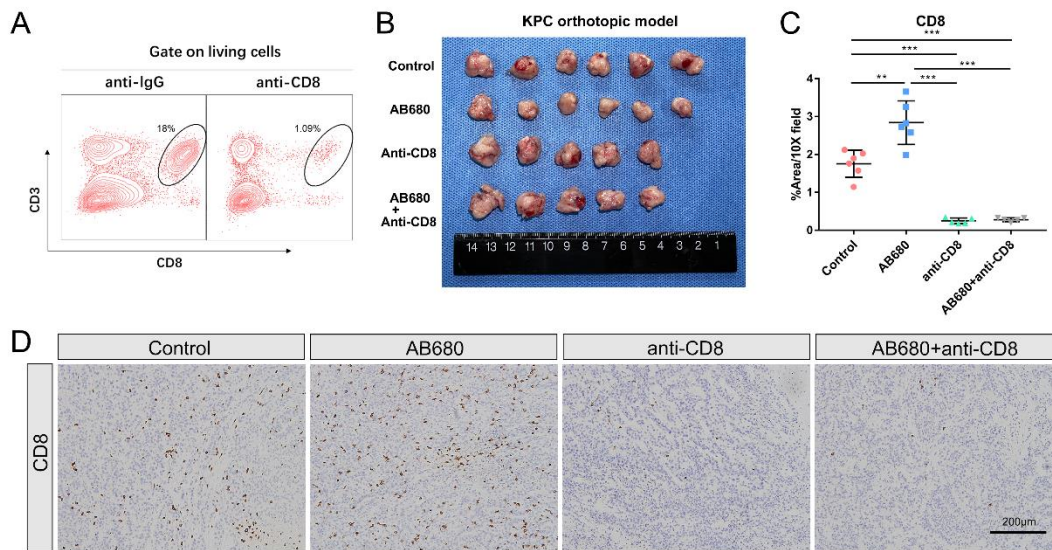

**Supplementary Figure 6.** CD8<sup>+</sup> T cells are the key mediators for the antitumor response of AB680. (A) Flow cytometry analysis showing the depletion of CD8<sup>+</sup> T cells in the spleen undergoing treatment with anti-CD8 antibody. (B) The gross appearance of the orthotopic KPC tumors from the Control(n=6), AB680(n=6), anti-CD8(n=5), and AB680+anti-CD8(n=5) groups. (C) Quantification of CD8 % positive area in the tumors of each group at the endpoint. \*\*p<0.01, \*\*\*p<0.001 in Student's t-test. Data presented as mean ± SD. (D) Representative images of immunohistochemistry staining of CD8 in the KPC tumors from the control, AB680, anti-CD8, and AB680+anti-CD8 groups. Scale bar: 200µm.

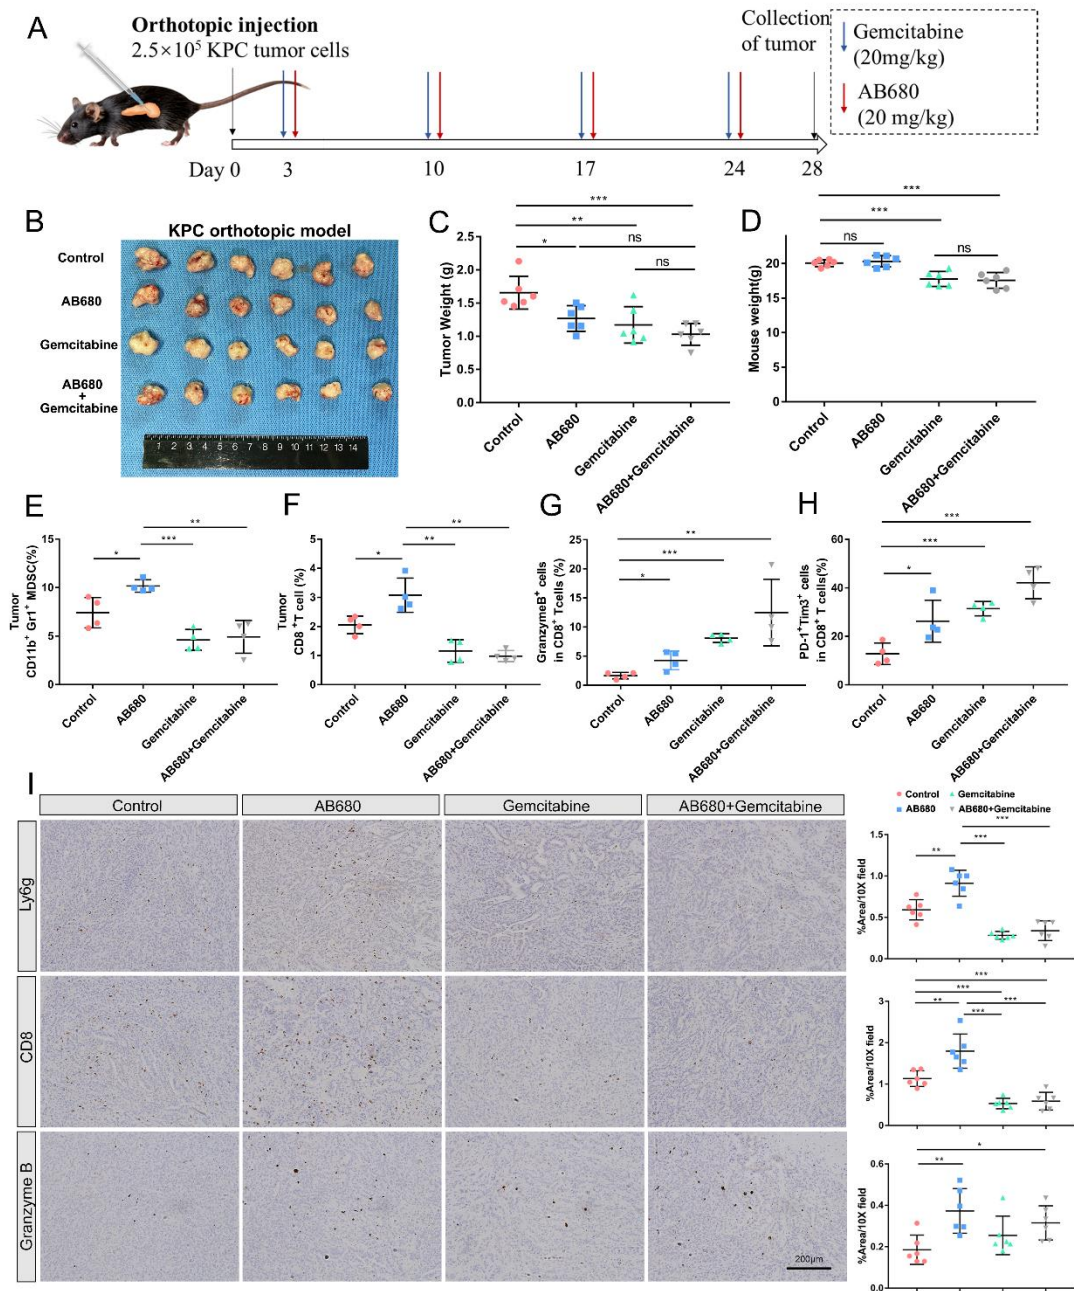

**Supplementary Figure 7.** Combination of AB680 and gemcitabine cannot enhance the effect to suppress tumor growth. (A) Schematic representation of the therapy schedule for AB680 and gemcitabine in the KPC orthotopic model. (B-D) Image (B), tumor weight (C), and body weight (D) of KPC orthotopic tumors from the indicated treatment groups (n=6 samples per group). Data presented as mean  $\pm$  SD. ns = no significance, \*p<0.05, \*\*p<0.01, \*\*\*p<0.001 in Student's t-test. (E-H) The percentages of CD11b<sup>+</sup>Gr1<sup>+</sup>MDSCs (E), CD8<sup>+</sup> T cells (F), Granzyme B<sup>+</sup> (G), and PD1<sup>+</sup>TIM3<sup>+</sup> cells (H) among the total CD8<sup>+</sup> T cells in the tumors of each group at the endpoint determined by flow cytometry (n=4 samples per group). Data presented as mean  $\pm$  SD. \*p<0.05, \*\*p<0.01, \*\*\*p<0.001 in Student's t-test. (I) Representative images and quantification of immunohistochemistry staining of Ly6G, CD8, and Granzyme B in the KPC tumors



from the control, AB680, Gemcitabine, and AB680+Gemcitabine groups. Scale bar: 200 $\mu$ m. n=6 samples per group. Data presented as mean  $\pm$  SD. \* $p$ <0.05, \*\* $p$ <0.01, \*\*\* $p$ <0.001 in Student's t-test.

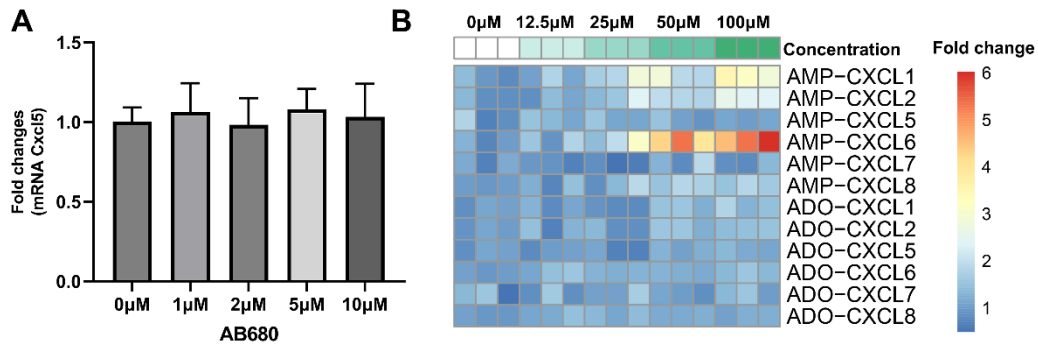

**Supplementary Figure 8.** Regulation of the indicated chemokine following different concentrations of drugs. (A) qRT-PCR analysis of Cxcl5 mRNA expression in the KPC cells with different concentrations of AB680 at 0, 1, 2, 5, and 10  $\mu$ M (n=3). (B) qRT-PCR analysis of the ligands of CXCR2 (CXCL1, CXCL2, CXCL5, CXCL6, CXCL7, and CXCL8) mRNA expression in the PANC1 cells with different concentrations of AMP and ADO at 0, 10, 20, 50, and 100  $\mu$ M (n=3). ADO, adenosine.



|    |       |                        |           |             |              |
|----|-------|------------------------|-----------|-------------|--------------|
| 6  | 143Nd | CD366(Tim-3)           | RMT 3-23  | Biolegend   | 119702       |
| 7  | 144Nd | T-bet                  | 4B10      | BioLegend   | 644802       |
| 8  | 145Nd | CD152(CTLA-4)          | UC10-4B9  | Biolegend   | 106302       |
| 9  | 146Nd | CD206(MMR)             | C068C2    | Biolegend   | 141702       |
| 10 | 147Sm | Ly-6G                  | 1A8       | Biolegend   | 127602       |
| 11 | 148Nd | Ly-6C                  | HK1.4     | Biolegend   | 128002       |
| 12 | 149Sm | CD19                   | 6D5       | Biolegend   | 115502       |
| 13 | 150Nd | CD127(IL-7R $\alpha$ ) | A7R34     | Biolegend   | 135002       |
| 14 | 151Eu | CD62L                  | MEL-14    | Biolegend   | 104402       |
| 15 | 152Sm | CD11c                  | N418      | Biolegend   | 117302       |
| 16 | 153Eu | CD44                   | IM7       | Biolegend   | 103002       |
| 17 | 154Sm | CD73                   | TY/11.8   | Biolegend   | 127202       |
| 18 | 155Gd | CD223 (LAG-3)          | C9B7W     | Biolegend   | 125202       |
| 19 | 156Gd | GITR(TNFRSF18)         | 2375B     | R&D         | MAB52412-100 |
| 20 | 157Gd | CD39                   | 5F2       | Biolegend   | 135702       |
| 21 | 158Gd | TCR $\gamma / \delta$  | GL3       | Biolegend   | 118140       |
| 22 | 159Tb | F4/80                  | C1:A3-1   | BioRAD      | MCA497G      |
| 23 | 160Gd | CD274(B7-H1,PD-L1)     | 10F.9G2   | Biolegend   | 124302       |
| 24 | 161Dy | TIGIT(VSTM3)           | 2190A     | R&D         | MAB72671     |
| 25 | 162Dy | CD183(CXCR3)           | CXCR3-173 | Biolegend   | 126502       |
| 26 | 163Dy | CD25                   | 3C7       | Biolegend   | 101902       |
| 27 | 164Dy | CD272                  | 6A6       | Biolegend   | 139117       |
| 28 | 165Ho | CD278(ICOS)            | C398.4A   | BioLegend   | 313502       |
| 29 | 166Er | CD194(CCR4)            | 2G12      | Biolegend   | 131202       |
| 30 | 167Er | CD134(OX40)            | OX-86     | Biolegend   | 119429       |
| 31 | 168Er | FOXP3                  | FJK-16s   | eBioscience | 14-5773-82   |
| 32 | 169Tm | CD47                   | Miap301   | Biolegend   | 127502       |
| 33 | 170Er | CD161(NK-1.1)          | PK136     | Biolegend   | 108702       |
| 34 | 171Yb | CX3CR1                 | SA011F11  | Biolegend   | 149002       |
| 35 | 172Yb | CD279(PD-1)            | 29F.1A12  | Biolegend   | 135202       |
| 36 | 173Yb | Granzyme B Fluidigm    | GB11      | Fluidigm    | 3173006B     |
| 37 | 174Yb | IFN- $\gamma$          | XMG1.2    | Bio-Xcell   | BE0055       |
| 38 | 175Lu | TCR $\beta$ chain      | H57-597   | Biolegend   | 109202       |
| 39 | 176Yb | TNF- $\alpha$          | MP6-XT22  | Biolegend   | 506302       |
| 40 | 197Au | CD4                    | RM4-5     | Biolegend   | 100520       |
| 41 | 198Pt | CD8a                   | 53-6.7    | Biolegend   | 100746       |
| 42 | 209Bi | CD11b                  | M1/70     | BioLegend   | 101202       |
